# Supplementary material
Source: publisher figshare collection journal article supplement (https://acs.figshare.com/ndownloader/files/4992049)
Supplement: Supplementary file 1 [file 4992049]

## Supporting Information

### Multilayered Perovskite Materials Based on Polymeric-Ammonium Cations for Stable and Large-Area Solar Cell

Kai Yao, Xiaofeng Wang, Yun-xiang Xu, Fan Li, Lang Zhou

#### Experimental Section

*Materials:* All the chemicals were used as received, including PbI<sub>2</sub> (99%, Sigma–Aldrich), MAI (99%, Sigma–Aldrich), hydroiodic acid (57 wt% in water with 1.5% hypophosphorous acid, Alfa Aesar) and polyethylenimine, ethylenediamine branched (PEI, M<sub>w</sub> ~ 800, Aldrich). Polymeric ammonium (PEI·HI) was synthesized as our previous work<sup>[30]</sup>. 2D (PEI)<sub>2</sub>(MA)<sub>n-1</sub>Pb<sub>n</sub>I<sub>3n+1</sub> (*n* = 3, 5, 7) family of perovskite compounds were synthesized from a stoichiometric reaction between PbI<sub>2</sub>, MAI, and n-butylamine (BA). Taking (PEI)<sub>2</sub>(MA)<sub>2</sub>Pb<sub>3</sub>I<sub>10</sub> for example, solid PEI·HI (0.0011 mmol), MAI (0.010 mmol), and PbI<sub>2</sub> (0.015 mmol) were dissolved in 10mL γ-Butyrolactone (GBL) at 70°C. The stirring was then discontinued, and the solution was left to cool to room temperature during which time deep-red rectangular-shaped plates started to crystallize. The crystals were isolated by filtration and then dried under reduced pressure.

*Device Fabrication:* ITO (15 ohm/sq) on glass were cleaned sequentially with detergent and deionized water, acetone, and isopropanol under sonication for 10 min. Commercial aqueous dispersion of PEDOT:PSS (Clevios PVP Al 4083) was spin-coated (4k rpm) on pre-cleaned and dry ITO substrate. For MAPbI<sub>3</sub> and 2D perovskite films deposition, the 1.0 M Pb<sup>2+</sup> perovskite precursors in DMF were spin-coated at 3000 rpm for 40 s. While for modified method for MAPbI<sub>3</sub> perovskite layer deposition was carried out using solvent-engineering: first, the 1.0 M DMF solution of PbI<sub>2</sub>/MAI mixture was spread onto the substrate; then, the spin-coater was started at a rotation speed of 1000 rpm for 10

seconds and 5000 rpm for another 30 seconds. 200  $\mu$ l toluene was drop-casted quickly 10 seconds after the 5000 rpm spin-coating started. The MAPbI<sub>3</sub> perovskite films were then heated at 100 °C on a hotplate for 10 min. Afterward, the PC<sub>61</sub>BM (20 mg/mL in chlorobenzene) was then sequentially deposited by spin coating at 1.2 k rpm for 60 s. LiF interlayer and Ag electrode were thermally evaporated on top of the film under high vacuum ( $<2 \times 10^{-6}$  Torr) with the thickness of 1 nm and 200 nm, respectively, through a shadow mask of various area (0.04, 0.82 or 2.32 cm<sup>2</sup>).

*Characterizations:* SEM images were obtained by using a JSM-6500F field-emission scanning electron microscope. The UPS measurements were performed in a Kratos Ultra Spectrometer (AXIS-ULTRA DLD-600W) using monochromatized HeI (21.2 eV for UPS) discharge lamp. The IPES spectra were recorded using a custom-made spectrometer, composed of a commercial Kimball Physics ELG-2 electron gun and a band pass photon detector. The photon detector worked in the isochromatic mode centered at a fixed energy of 9.8 eV. The current-voltage characteristics were measured using a black metal mask with an aperture area of 0.04, 0.82 or 2.32 cm<sup>2</sup> under standard air mass 1.5 sunlight (300 W xenon arc solar simulator). The illumination intensity of the light source was accurately calibrated employing a standard Si photodiode detector equipped with a KG-5 filter, which can be traced back to the standard cell of the National Renewable Energy Laboratory (NREL). The EQE spectra performed here were obtained from an IPCE setup consisting of a Xenon lamp (Oriel, 450 W) as the light source, a monochromator, a chopper with a frequency of 100Hz, a lock-in amplifier, and a Si-based diode for calibration. The calculated  $J_{sc}$  values obtained by integrating the EQE spectrum under the AM 1.5G illumination condition agreed well with the measured  $J_{sc}$

value from  $J$ - $V$  characteristics and the differences were within 3%. The time-resolved photoluminescence characterizations were done on an Edinburg FLS 920 (Edinburg90 Co. LTD).

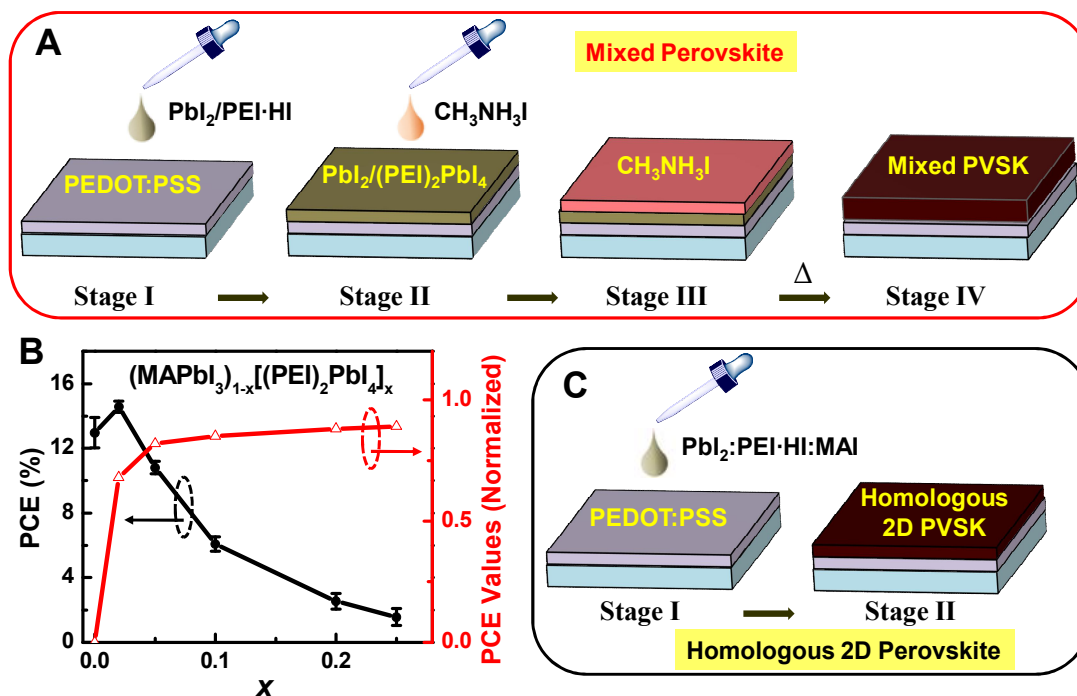

**Figure S1.** A) Schematic of mixed perovskite  $(\text{MAPbI}_3)_{1-x}[(\text{PEI})_2\text{PbI}_4]_x$  processed from two-step method. B) Left: Initial PCE values for cells using  $(\text{MAPbI}_3)_{1-x}[(\text{PEI})_2\text{PbI}_4]_x$  materials; Right: Moisture stability of a photovoltaic device fabricated from perovskite films with different compositions after storing for a month. C) Schematic of 2D homologous perovskite  $(\text{PEI})_2(\text{MA})_{n-1}\text{Pb}_n\text{I}_{3n+1}$  processed from one-step method.

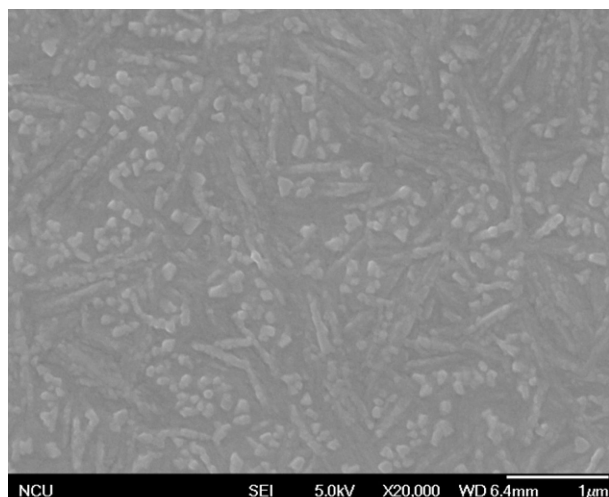

**Figure S2.** The surface-view SEM images of the mixed perovskite  $(\text{MAPbI}_3)_{1-x}[(\text{PEI})_2\text{PbI}_4]_x$  film with the containing of layered perovskite about ( $x$  value) 20%. The large phase-separation of the films indicated the severe carrier recombination in the bulk.

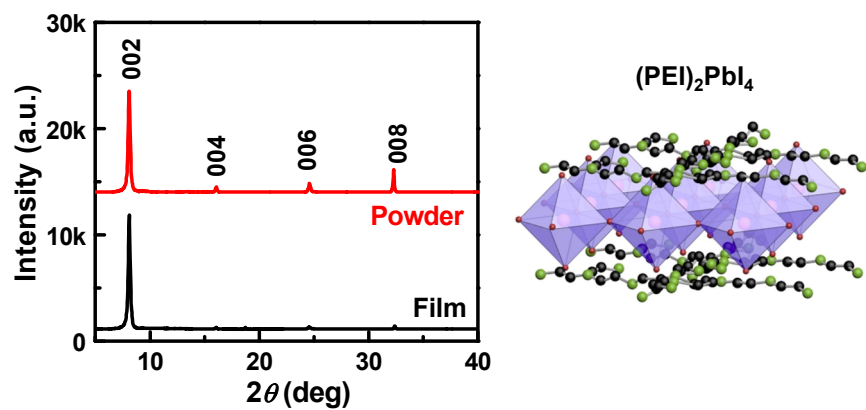

**Figure S3.** XRD pattern of thin films and bulk materials of 2D perovskites  $(\text{PEI})_2\text{PbI}_4$ , with the schematic structure.

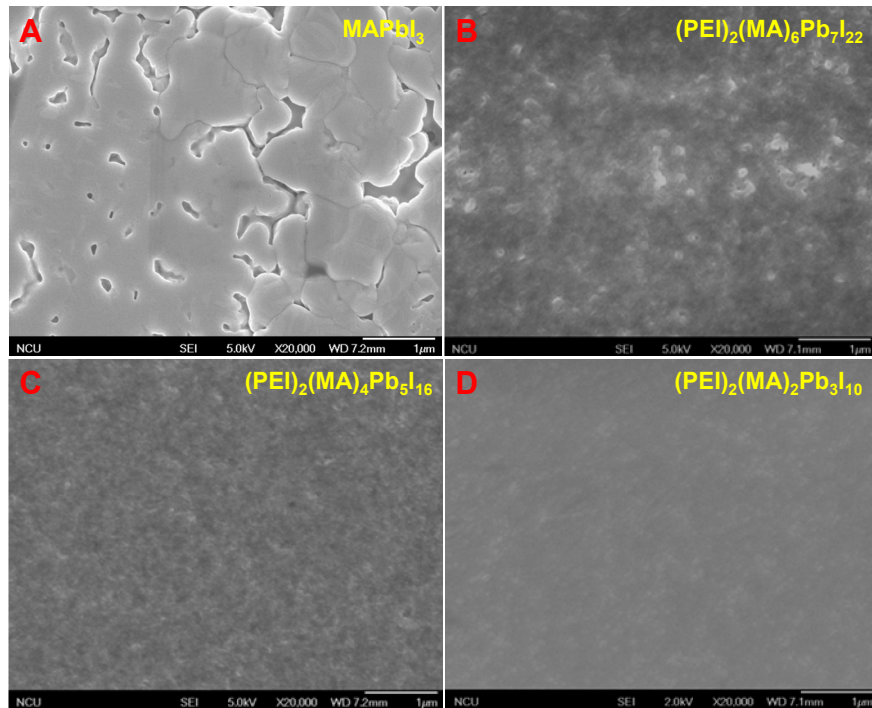

**Figure S4.** Top surface SEM images of  $\text{MAPbI}_3$  and  $(\text{PEI})_2(\text{MA})_{n-1}\text{Pb}_n\text{I}_{3n+1}$  films.

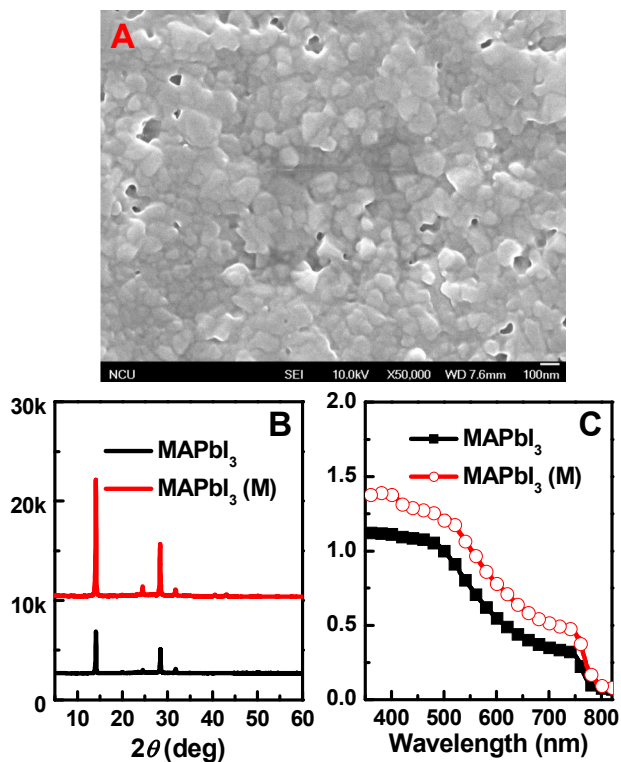

**Figure S5.** The surface-view SEM images (A), XRD patterns (B) and absorption spectra (C) of the MAPbI<sub>3</sub> (M) film prepared by solution-engineering approach. The increased light absorption and enhanced reflection intensities confirmed the formation of highly crystallized MAPbI<sub>3</sub> films under the modified methods.

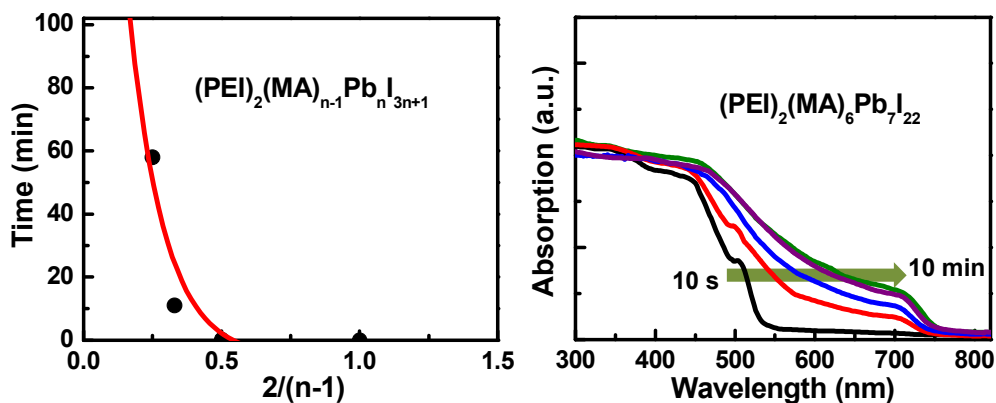

**Figure S6.** (A) The time for multilayered structure formation of different (PEI)<sub>2</sub>(MA)<sub>n-1</sub>Pb<sub>n</sub>I<sub>3n+1</sub> ( $n = 3, 5, 7$ ) perovskite compounds, based on the UV-vis absorption data; (B) The absorption of the (PEI)<sub>2</sub>(MA)<sub>6</sub>Pb<sub>7</sub>I<sub>22</sub> films with various placement time (10 s, 60 s, 4 min, 8 min and 10 min). From absorption spectra, both PbI<sub>2</sub> and perovskite coexist in the film in initial stage.

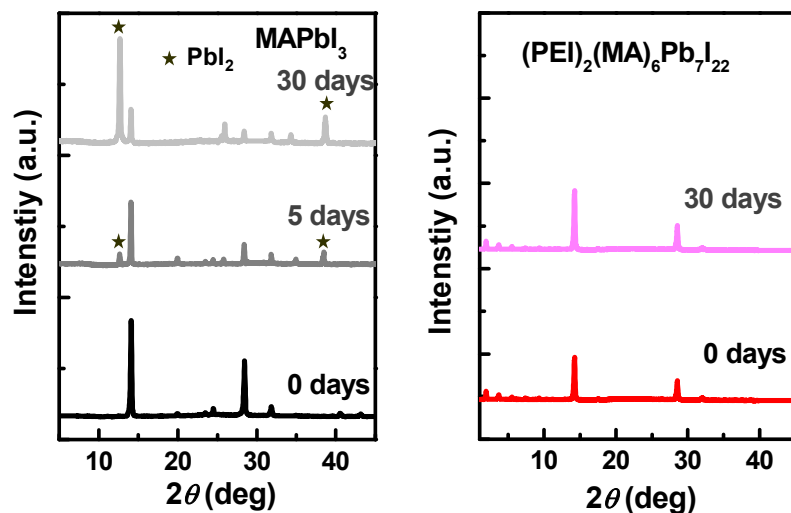

**Figure S7.** XRD patterns of films of MAPbI<sub>3</sub> and (PEI)<sub>2</sub>(MA)<sub>6</sub>Pb<sub>7</sub>I<sub>22</sub> exposed to 50% relative humidity. Asterisks denote the major reflections from PbI<sub>2</sub>.

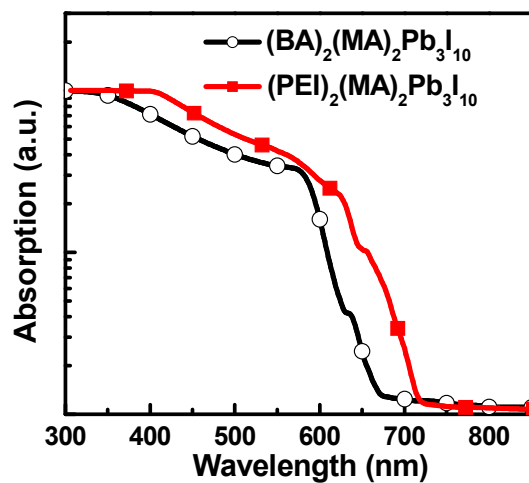

**Figure S8.** UV-visible absorbance spectrum of (PEI)<sub>2</sub>(MA)<sub>2</sub>Pb<sub>3</sub>I<sub>10</sub> and (BA)<sub>2</sub>(MA)<sub>2</sub>Pb<sub>3</sub>I<sub>10</sub>. The change of the band gap indicated the interaction of between the organic and inorganic components.

**Table S1** Time resolved photoluminescence characterization of the various perovskite films.<sup>1, 2</sup>

| Compounds                                                            | Fraction 1 | $\tau_1$ (ns) | Fraction 2 | $\tau_2$ (ns) |
|----------------------------------------------------------------------|------------|---------------|------------|---------------|
| MAPbI <sub>3</sub>                                                   | 79%        | 8.04          | 21%        | 81.47         |
| (PEI) <sub>2</sub> (MA) <sub>6</sub> Pb <sub>7</sub> I <sub>22</sub> | 84%        | 5.72          | 16%        | 25.24         |
| (BA) <sub>2</sub> (MA) <sub>6</sub> Pb <sub>7</sub> I <sub>22</sub>  | 100%       | 4.11          | -          | -             |

Note 1: We prepared the perovskite layers with sealing of a 50-nm-thick poly(methylmethacrylate) (PMMA) layer.

Note 2: The lifetime was obtained by fitting the PL measured from perovskite films with a bi-exponential decay function of the form:

$$I(t) = A_1 \exp\left(-\frac{t}{\tau_1}\right) + A_2 \exp\left(-\frac{t}{\tau_2}\right)$$

Note 3: The two fractions in the PL decay of (BA)<sub>2</sub>(MA)<sub>6</sub>Pb<sub>7</sub>I<sub>22</sub> films were found in the same, which demonstrated the mono-exponential decay.

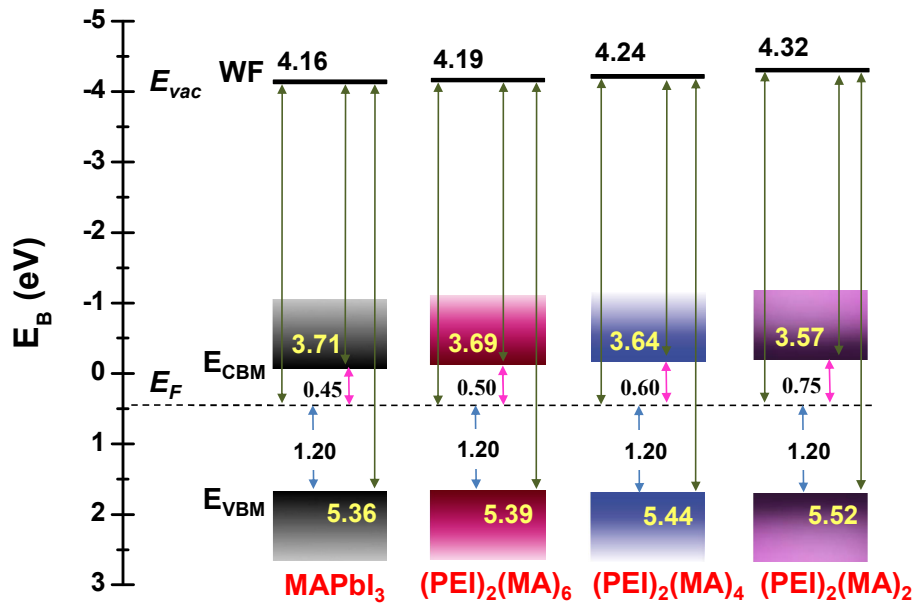

**Figure S9.** Experimentally determined energy level diagrams of MAPbI<sub>3</sub> and (PEI)<sub>2</sub>(MA)<sub>n-1</sub>Pb<sub>n</sub>I<sub>3n+1</sub> ( $n = 3, 5, 7$ ) films from UPS and IPES spectra. Each diagram provides the Fermi level position, work function, conduction band minimum (CBM) and valence band maximum (VBM).



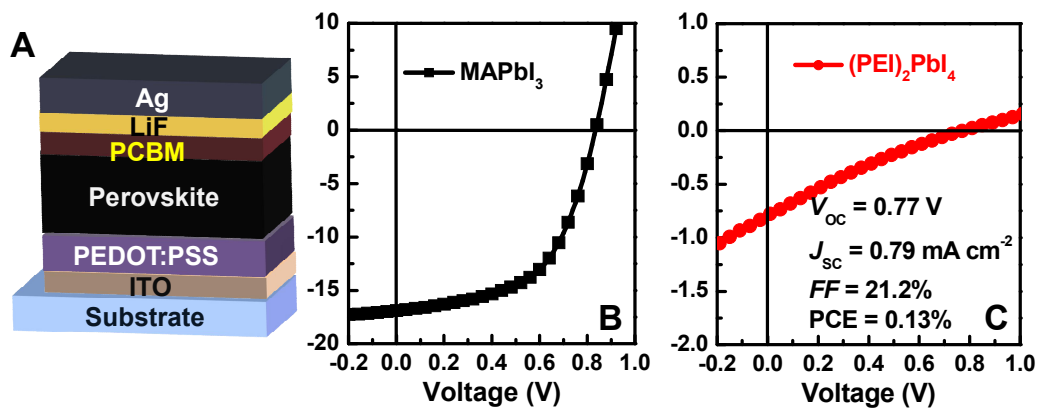

**Figure S10.** (A) Diagram of the cell configuration;  $J$ - $V$  curves of  $\text{MAPbI}_3$  (B) and  $(\text{PEI})_2\text{PbI}_4$  (C) solar cells deposited from conventional one-step spin-coating process.

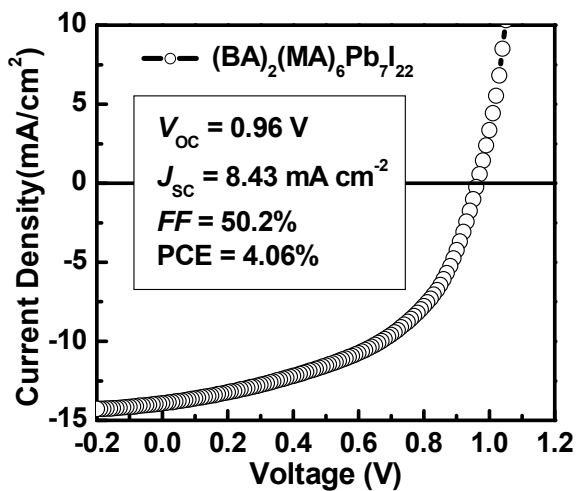

**Figure S11.** The characterization of photovoltaic performance:  $J$ - $V$  curves of  $(\text{BA})_2(\text{MA})_6\text{Pb}_7\text{I}_{22}$ -based devices.

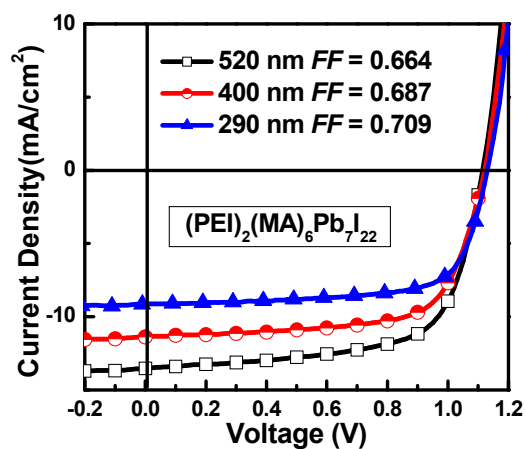

**Figure S12.**  $J$ - $V$  curves of  $(\text{PEI})_2(\text{MA})_6\text{Pb}_7\text{I}_{22}$ -based devices with various active layer thickness.

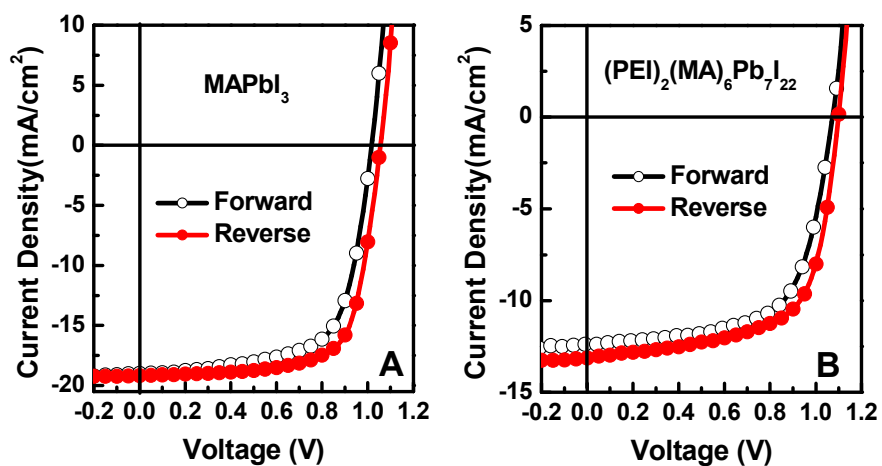

**Figure S13.**  $J$ - $V$  curves of forward and reverse bias sweep for the solar cell using the  $\text{MAPbI}_3$  (M) and  $(\text{PEI})_2(\text{MA})_6\text{Pb}_7\text{I}_{22}$  perovskite active layer, step width = 50 mV and delay time = 5000 ms.

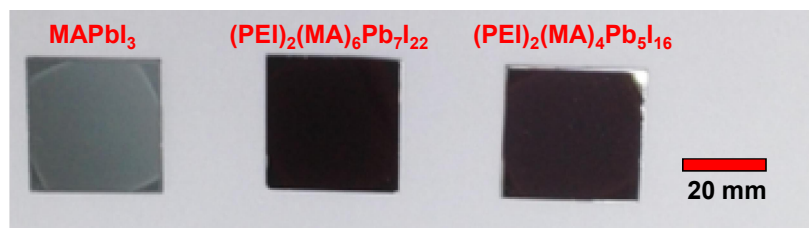

**Figure S14.** Digital photograph of MAPbI<sub>3</sub> and (PEI)<sub>2</sub>(MA)<sub>n-1</sub>Pb<sub>n</sub>I<sub>3n+1</sub> ( $n = 5, 7$ ) films in relative large area (3.5 cm × 3.5 cm).

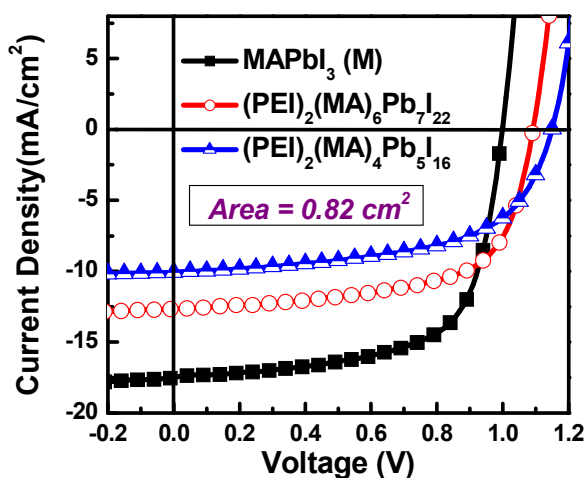

**Figure S15.**  $J$ - $V$  curve for the (PEI)<sub>2</sub>(MA)<sub>n-1</sub>Pb<sub>n</sub>I<sub>3n+1</sub> perovskites and MAPbI<sub>3</sub> (M) based devices in aperture area of 0.82 cm<sup>2</sup>.

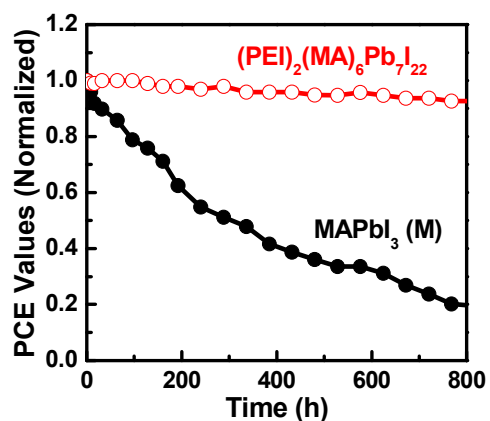

**Figure S16.** Stability of MAPbI<sub>3</sub> and (PEI)<sub>2</sub>(MA)<sub>6</sub>Pb<sub>7</sub>I<sub>22</sub> cells (unsealed) kept in the dark.

**Table S2** Performance of perovskite devices under AM 1.5G illumination (100 mW cm<sup>-2</sup>) with small-size cells (0.82 cm<sup>2</sup>). The fabrication procedure was similar for all devices in optimized condition.

| Device                                                               | $J_{sc}$ (mA cm <sup>-2</sup> ) | $V_{oc}$ (V) | FF          | PCE (%) <sup>a</sup> |
|----------------------------------------------------------------------|---------------------------------|--------------|-------------|----------------------|
| MAPbI <sub>3</sub> (M)                                               | 17.51 ± 0.75                    | 1.00 ± 0.04  | 0.66 ± 0.03 | 11.76 ± 0.71 (12.98) |
| (PEI) <sub>2</sub> (MA) <sub>6</sub> Pb <sub>7</sub> I <sub>22</sub> | 12.67 ± 0.50                    | 1.09 ± 0.02  | 0.64 ± 0.02 | 8.87 ± 0.45 (9.49)   |
| (PEI) <sub>2</sub> (MA) <sub>4</sub> Pb <sub>5</sub> I <sub>16</sub> | 10.07 ± 0.42                    | 1.15 ± 0.01  | 0.58 ± 0.01 | 6.77 ± 0.41 (7.16)   |
